# Supplementary material
Source: PubMed Central journal article supplement (PMC3409277)
Supplement: 11_416_Godby.Suppl.pdf [file 11_416_Godby.Suppl.pdf]

Supplemental Data

Nonproteolytic Properties of Murine Alternatively Spliced Tissue Factor: Implications for Integrin-Mediated Signaling in Murine Models

Richard C Godby,<sup>1\*</sup> Yascha W van den Berg,<sup>2\*</sup> Ramprasad Srinivasan,<sup>1</sup> Robert Sturm,<sup>1</sup> David Y Hui,<sup>3</sup> Stephen F Konieczny,<sup>4</sup> Bruce J Aronow,<sup>5</sup> Evgeny Ozhegov,<sup>1</sup> Wolfram Ruf,<sup>6</sup> Henri H Versteeg,<sup>2\*</sup> and Vladimir Y Bogdanov<sup>1\*</sup>

Online address: <http://www.molmed.org>

The Feinstein Institute for Medical Research 

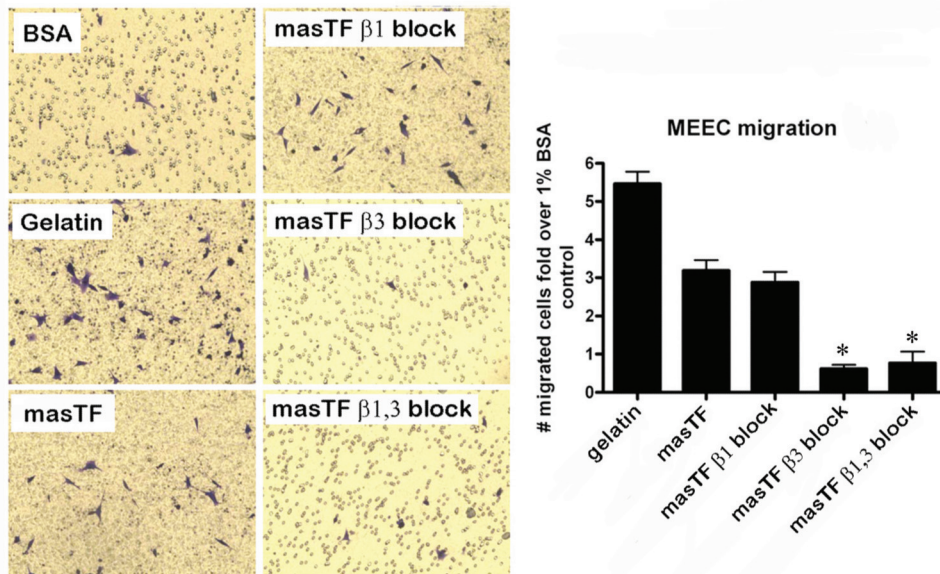

**Supplementary Figure S1.** masTF elicits  $\beta$ 3 integrin-dependent migration of MEEC. Transwell inserts were coated with BSA (negative control), 1% gelatin (positive control), and 50  $\mu$ g/mL masTF, following which MEEC were pre-incubated with integrin-blocking antibodies and seeded onto the wells ( $n \geq 3$ ). Flattened cells were counted. Cells were fixed with 4% formaldehyde and stained with 0.1% Crystal Violet; quantifications are shown in the graph, representative images are on the left ( $n \geq 3$ ). \* $p < 0.01$  vs masTF.

**NONPROTEOLYTIC PROPERTIES OF MURINE *astF***

**Supplementary Table S1.** Genes expressed in murine ECs (b.End.3) whose transcripts were upregulated by at least 1.2 fold or downregulated by at least 0.9 fold in response to *hasTF* and *masTF*.

| No. | Gene Symbol | Gene Description                                                                    | Fold Change |
|-----|-------------|-------------------------------------------------------------------------------------|-------------|
| 1   | Cxcl2       | chemokine (C-X-C motif) ligand 2                                                    | 29.3        |
| 2   | Vcam1       | vascular cell adhesion molecule 1                                                   | 6.5         |
| 3   | Cxcl1       | chemokine (C-X-C motif) ligand 1                                                    | 5.2         |
| 4   | Ccl2        | chemokine (C-C motif) ligand 2                                                      | 3.7         |
| 5   | Csf1        | colony stimulating factor 1 (macrophage)                                            | 3.7         |
| 6   | Cxcl10      | chemokine (C-X-C motif) ligand 10                                                   | 3.1         |
| 7   | Ccl7        | chemokine (C-C motif) ligand 7                                                      | 2.4         |
| 8   | Ripk2       | receptor (TNFRSF)-interacting serine-threonine kinase 2                             | 2.4         |
| 9   | Cebpd       | CCAAT/enhancer binding protein (C/EBP), delta                                       | 2.2         |
| 10  | Casp4       | caspase 4, apoptosis-related cysteine peptidase                                     | 2.1         |
| 11  | Nfkbia      | nuclear factor of kappa light polypeptide gene enhancer in B-cells inhibitor, alpha | 1.8         |
| 12  | Birc3       | baculoviral IAP repeat-containing 3                                                 | 1.8         |
| 13  | Gbp1        | guanylate binding protein 1                                                         | 1.8         |
| 14  | Tslp        | thymic stromal lymphopoietin                                                        | 1.7         |
| 15  | Snord49b    | small nucleolar RNA, C/D box 49B                                                    | 1.6         |
| 16  | Ch25h       | cholesterol 25-hydroxylase                                                          | 1.6         |
| 17  | Ccl5        | chemokine (C-C motif) ligand 5                                                      | 1.6         |
| 18  | Cenpw       | centromere protein W                                                                | 1.6         |
| 19  | Mrpl52      | mitochondrial ribosomal protein L52                                                 | 1.5         |
| 20  | Ddx28       | DEAD (Asp-Glu-Ala-Asp) box polypeptide 28                                           | 1.5         |
| 21  | Endog       | endonuclease G                                                                      | 1.5         |
| 22  | Purb        | purine rich element binding protein B                                               | 1.5         |
| 23  | Rpia        | ribose 5-phosphate isomerase A                                                      | 1.5         |
| 24  | Samd4       | sterile alpha motif domain containing 4                                             | 1.5         |
| 25  | Lclat1      | lysocardiolipin acyltransferase 1                                                   | 1.4         |
| 26  | Cdkn2b      | cyclin-dependent kinase inhibitor 2B                                                | 1.4         |
| 27  | Chd7        | chromodomain helicase DNA binding protein 7                                         | 1.4         |
| 28  | SNORA38     | Small nucleolar RNA 38                                                              | 1.4         |
| 29  | Bach1       | BTB and CNC homology 1                                                              | 1.4         |
| 30  | Zadh2       | zinc binding alcohol dehydrogenase, domain containing 2                             | 1.4         |
| 31  | Tusc1       | tumor suppressor candidate 1                                                        | 1.4         |
| 32  | Ndufa13     | NADH dehydrogenase (ubiquinone) 1 alpha subcomplex, 13                              | 1.4         |
| 33  | E2f3        | E2F transcription factor 3                                                          | 1.4         |
| 34  | Chst7       | carbohydrate (N-acetylglucosamino) sulfotransferase 7                               | 1.3         |
| 35  | Chic2       | cysteine-rich hydrophobic domain 2                                                  | 1.3         |
| 36  | Jund        | Jun proto-oncogene related gene d                                                   | 1.3         |
| 37  | Cebpb       | CCAAT/enhancer binding protein (C/EBP), beta                                        | 1.3         |
| 38  | Mfsd7b      | major facilitator superfamily domain containing 7B                                  | 1.3         |
| 39  | Mafb        | v-maf musculoaponeurotic fibrosarcoma oncogene family, protein B                    | 1.3         |
| 40  | Ntn1        | netrin 1                                                                            | 1.3         |
| 41  | Taf1d       | TATA box binding protein (Tbp)-associated factor, RNA polymerase I, D               | 1.3         |
| 42  | Gas5        | SNORD77                                                                             | 1.3         |
| 43  | Magohb      | mago-nashi homolog B                                                                | 1.3         |
| 44  | Aim2        | absent in melanoma 2                                                                | 1.3         |
| 45  | Rtn4rl2     | reticulon 4 receptor-like 2                                                         | 1.3         |
| 46  | Ccdc9       | coiled-coil domain containing 9                                                     | 1.3         |
| 47  | Dmwd        | dystrophia myotonica-containing WD repeat motif                                     | 1.3         |
| 48  | Ocl1        | occludin/ELL domain containing 1                                                    | 1.3         |
| 49  | H2-Ke2      | H2-K region expressed gene 2                                                        | 1.3         |
| 50  | Mrpl47      | mitochondrial ribosomal protein L47                                                 | 1.3         |
| 51  | Atf7        | activating transcription factor 7                                                   | 1.3         |
| 52  | Dpysl3      | dihydropyrimidinase-like 3                                                          | 1.3         |

*Continued*

Supplementary Table S1. *Continued.*

|     |          |                                                                 |     |
|-----|----------|-----------------------------------------------------------------|-----|
| 53  | Nudt3    | nudix (nucleotide diphosphate linked moiety X)-type motif 3     | 1.3 |
| 54  | Prr23a   | proline rich 23A                                                | 1.3 |
| 55  | Strn4    | striatin, calmodulin binding protein 4                          | 1.3 |
| 56  | Polr2c   | polymerase (RNA) II polypeptide C                               | 1.3 |
| 57  | Rhou     | ras homolog gene family, member U                               | 1.3 |
| 58  | Ifi204   | interferon activated gene 204                                   | 1.3 |
| 59  | Tshz1    | teashirt zinc finger family member 1                            | 1.3 |
| 60  | Brp44    | brain protein 44                                                | 1.3 |
| 61  | Chd7     | chromodomain helicase DNA binding protein 7                     | 1.2 |
| 62  | Sash1    | SAM and SH3 domain containing 1                                 | 1.2 |
| 63  | Prkrip1  | Prkr interacting protein 1 (IL11 inducible)                     | 1.2 |
| 64  | Nkiras1  | NFKB inhibitor interacting Ras-like protein 1                   | 1.2 |
| 65  | Map11c3a | microtubule-associated protein 1 light chain 3 alpha            | 1.2 |
| 66  | Rala     | v-ral simian leukemia viral oncogene homolog A (ras related)    | 1.2 |
| 67  | Chd2     | chromodomain helicase DNA binding protein 2                     | 1.2 |
| 68  | Zeb2     | zinc finger E-box binding homeobox 2                            | 1.2 |
| 69  | Junb     | Jun-B oncogene                                                  | 1.2 |
| 70  | Pbld2    | phenazine biosynthesis-like protein domain containing 2         | 1.2 |
| 71  | Frm6     | FERM domain containing 6                                        | 1.2 |
| 72  | Ssbp4    | single stranded DNA binding protein 4                           | 1.2 |
| 73  | Aqp2     | aquaporin 2                                                     | 1.2 |
| 74  | Mrps16   | mitochondrial ribosomal protein S16                             | 1.2 |
| 75  | Trav2    | T cell receptor alpha variable 2                                | 1.2 |
| 76  | Polr3d   | polymerase (RNA) III polypeptide D                              | 1.2 |
| 77  | Ccdc66   | coiled-coil domain containing 66                                | 1.2 |
| 78  | Ccdc90b  | coiled-coil domain containing 90B                               | 1.2 |
| 79  | Med26    | mediator complex subunit 26                                     | 1.2 |
| 80  | Nfya     | nuclear transcription factor-Y alpha                            | 1.2 |
| 81  | Golph3   | golgi phosphoprotein 3                                          | 1.2 |
| 82  | Wdfy1    | WD repeat and FYVE domain containing 1                          | 1.2 |
| 83  | Cdc42ep4 | CDC42 effector protein (Rho GTPase binding) 4                   | 1.2 |
| 84  | Zar1     | zygote arrest 1                                                 | 1.2 |
| 85  | Nosip    | nitric oxide synthase interacting protein                       | 1.2 |
| 86  | Polr3gl  | polymerase (RNA) III polypeptide G like                         | 1.2 |
| 87  | Gm5939   | predicted pseudogene 5939                                       | 1.2 |
| 88  | Vax1     | ventral anterior homeobox containing gene 1                     | 1.2 |
| 89  | Igfbp7   | insulin-like growth factor binding protein 7                    | 1.2 |
| 90  | Gm7312   | predicted gene 7312                                             | 1.2 |
| 91  | Sdc4     | syndecan 4                                                      | 1.2 |
| 92  | Akap12   | A kinase (PRKA) anchor protein (gravin) 12                      | 1.2 |
| 93  | Mir615   | microRNA 615                                                    | 1.2 |
| 94  | Rpl14    | ribosomal protein L14                                           | 1.2 |
| 95  | Mrps34   | mitochondrial ribosomal protein S34                             | 1.2 |
| 96  | Cars2    | cysteinyl-tRNA synthetase 2 (mitochondrial)                     | 0.9 |
| 97  | Gm16410  | predicted gene 16410                                            | 0.9 |
| 98  | Sh3d19   | SH3 domain protein D19                                          | 0.8 |
| 99  | Stard7   | START domain containing 7                                       | 0.8 |
| 100 | Klf3     | Kruppel-like factor 3 (basic)                                   | 0.8 |
| 101 | Dnalc4   | dynein, axonemal, light chain 4                                 | 0.8 |
| 102 | Ccng2    | cyclin G2                                                       | 0.8 |
| 103 | Gm4831   | predicted gene 4831                                             | 0.8 |
| 104 | Ltbp3    | latent transforming growth factor beta binding protein 3        | 0.8 |
| 105 | Marveld1 | MARVEL (membrane-associating) domain containing 1               | 0.8 |
| 106 | Itprip1  | inositol 1,4,5-triphosphate receptor interacting protein-like 1 | 0.8 |
| 107 | Nans     | N-acetylneuraminic acid synthase                                | 0.8 |

*Continued*

Supplementary Table S1. *Continued.*

|     |          |                                                                                   |     |
|-----|----------|-----------------------------------------------------------------------------------|-----|
| 108 | Crtc1    | CREB regulated transcription coactivator 1                                        | 0.8 |
| 109 | Rassf3   | Ras association (RalGDS/AF-6) domain family member 3                              | 0.8 |
| 110 | Fam102a  | family with sequence similarity 102, member A                                     | 0.8 |
| 111 | Nefl     | neurofilament, light polypeptide                                                  | 0.8 |
| 112 | Cyb561d2 | cytochrome b-561 domain containing 2                                              | 0.8 |
| 113 | Rgs3     | regulator of G-protein signaling 3                                                | 0.8 |
| 114 | Ssna1    | Sjogren's syndrome nuclear autoantigen 1                                          | 0.8 |
| 115 | Mrpl51   | mitochondrial ribosomal protein L51                                               | 0.8 |
| 116 | Zfp362   | zinc finger protein 362                                                           | 0.8 |
| 117 | Acvr11   | activin A receptor, type II-like 1                                                | 0.8 |
| 118 | Lrrcc1   | leucine rich repeat coiled-coil domain containing 1                               | 0.8 |
| 119 | Fbxl2    | F-box and leucine-rich repeat protein 2                                           | 0.8 |
| 120 | Slc46a3  | solute carrier family 46, member 3                                                | 0.8 |
| 121 | Zdhhc8   | zinc finger, DHHC domain containing 8                                             | 0.8 |
| 122 | Dock8    | dedicator of cytokinesis 8                                                        | 0.8 |
| 123 | Rassf9   | Ras association (RalGDS/AF-6) domain family (N-terminal) member 9                 | 0.8 |
| 124 | Cep5711  | centrosomal protein 57-like 1                                                     | 0.8 |
| 125 | Cxx1c    | CAAX box 1 homolog C (human)                                                      | 0.8 |
| 126 | Ncoa7    | nuclear receptor coactivator 7                                                    | 0.8 |
| 127 | Gnptab   | N-acetylglucosamine-1-phosphate transferase, alpha and beta subunits              | 0.8 |
| 128 | Hdac5    | histone deacetylase 5                                                             | 0.8 |
| 129 | Acaa2    | acetyl-Coenzyme A acyltransferase 2 (mitochondrial 3-oxoacyl-Coenzyme A thiolase) | 0.8 |
| 130 | Caskin2  | CASK-interacting protein 2                                                        | 0.8 |
| 131 | Tfdp2    | transcription factor Dp 2                                                         | 0.8 |
| 132 | Tgfr2    | transforming growth factor, beta receptor II                                      | 0.8 |
| 133 | Gpr137   | G protein-coupled receptor 137                                                    | 0.8 |
| 134 | Tcta     | T-cell leukemia translocation altered gene                                        | 0.8 |
| 135 | St6gal1  | beta galactoside alpha 2,6 sialyltransferase 1                                    | 0.8 |
| 136 | Zmym5    | zinc finger, MYM-type 5                                                           | 0.8 |
| 137 | Nicn1    | nicotin 1                                                                         | 0.8 |
| 138 | Rfc2     | replication factor C (activator 1) 2                                              | 0.8 |
| 139 | Ephb4    | Eph receptor B4                                                                   | 0.8 |
| 140 | Uvrag    | UV radiation resistance associated gene                                           | 0.8 |
| 141 | Thsd1    | thrombospondin, type I, domain 1                                                  | 0.8 |
| 142 | Ncapd2   | non-SMC condensin I complex, subunit D2                                           | 0.8 |
| 143 | Zdhhc3   | zinc finger, DHHC domain containing 3                                             | 0.8 |
| 144 | Znf512b  | zinc finger protein 512B                                                          | 0.8 |
| 145 | Pik3r3   | phosphatidylinositol 3 kinase, regulatory subunit, polypeptide 3 (p55)            | 0.8 |
| 146 | Map2k6   | mitogen-activated protein kinase kinase 6                                         | 0.8 |
| 147 | Grasp    | GRP1 (general receptor for phosphoinositides 1)-associated scaffold protein       | 0.8 |
| 148 | Cpt1a    | carnitine palmitoyltransferase 1a, liver                                          | 0.8 |
| 149 | Gbf1     | golgi-specific brefeldin A-resistance factor 1                                    | 0.8 |
| 150 | Tmem64   | transmembrane protein 64                                                          | 0.7 |
| 151 | Epha4    | Eph receptor A4                                                                   | 0.7 |
| 152 | Zfp238   | zinc finger protein 238                                                           | 0.7 |
| 153 | Rbms2    | RNA binding motif, single stranded interacting protein 2                          | 0.7 |
| 154 | Dock6    | dedicator of cytokinesis 6                                                        | 0.7 |
| 155 | Ddit4    | DNA-damage-inducible transcript 4                                                 | 0.7 |
| 156 | Ggta1    | glycoprotein galactosyltransferase alpha 1, 3                                     | 0.7 |
| 157 | Zfp161   | zinc finger protein 161                                                           | 0.7 |
| 158 | Dock6    | dedicator of cytokinesis 6                                                        | 0.7 |
| 159 | Slc5a3   | solute carrier family 5 (inositol transporters), member 3                         | 0.7 |
| 160 | Tob1     | transducer of ErbB-2.1                                                            | 0.7 |
| 161 | Nfia     | nuclear factor I/A                                                                | 0.7 |
| 162 | Tm6sf1   | transmembrane 6 superfamily member 1                                              | 0.7 |

*Continued*

Supplementary Table S1. *Continued.*

|     |         |                                                                                                |     |
|-----|---------|------------------------------------------------------------------------------------------------|-----|
| 163 | Ptprb   | protein tyrosine phosphatase, receptor type, B                                                 | 0.7 |
| 164 | Sumf2   | sulfatase modifying factor 2                                                                   | 0.7 |
| 165 | Ube2cbp | ubiquitin-conjugating enzyme E2C binding protein                                               | 0.7 |
| 166 | Stk10   | serine/threonine kinase 10                                                                     | 0.7 |
| 167 | Wdr85   | WD repeat domain 85                                                                            | 0.7 |
| 168 | Klhdc10 | kelch domain containing 10                                                                     | 0.7 |
| 169 | Pfkfb3  | 6-phosphofructo-2-kinase/fructose-2,6-biphosphatase 3                                          | 0.7 |
| 170 | Tmem44  | transmembrane protein 44                                                                       | 0.7 |
| 171 | Asph    | aspartate-beta-hydroxylase                                                                     | 0.7 |
| 172 | Bpgm    | 2,3-bisphosphoglycerate mutase                                                                 | 0.7 |
| 173 | Lrrk2   | leucine-rich repeat kinase 2                                                                   | 0.7 |
| 174 | Mavs    | mitochondrial antiviral signaling protein                                                      | 0.7 |
| 175 | Rtp3    | receptor transporter protein 3                                                                 | 0.7 |
| 176 | Slc22a4 | solute carrier family 22 (organic cation transporter), member 4                                | 0.7 |
| 177 | Ppcs    | phosphopantothoenylcysteine synthetase                                                         | 0.7 |
| 178 | Ceacam1 | carcinoembryonic antigen-related cell adhesion molecule 1                                      | 0.7 |
| 179 | Sorbs2  | sorbin and SH3 domain containing 2                                                             | 0.7 |
| 180 | Gm10482 | predicted gene 10482                                                                           | 0.7 |
| 181 | Gm10482 | predicted gene 10482                                                                           | 0.7 |
| 182 | Fam198b | family with sequence similarity 198, member B                                                  | 0.7 |
| 183 | Gm6981  | predicted pseudogene 6981                                                                      | 0.7 |
| 184 | Tlll5   | tubulin tyrosine ligase-like family, member 5                                                  | 0.7 |
| 185 | Nfia    | nuclear factor I/A                                                                             | 0.7 |
| 186 | Gad2    | glutamic acid decarboxylase 2                                                                  | 0.7 |
| 187 | Herpud1 | homocysteine-inducible, endoplasmic reticulum stress-inducible, ubiquitin-like domain member 1 | 0.7 |
| 188 | Sema3g  | sema domain, immunoglobulin domain (Ig), short basic domain, secreted, (semaphorin) 3G         | 0.7 |
| 189 | Mecom   | MDS1 and EVI1 complex locus                                                                    | 0.7 |
| 190 | Mms22l  | MMS22-like, DNA repair protein                                                                 | 0.7 |
| 191 | Tenc1   | tensin like C1 domain-containing phosphatase                                                   | 0.7 |
| 192 | Podxl   | podocalyxin-like                                                                               | 0.7 |
| 193 | Mef2c   | myocyte enhancer factor 2C                                                                     | 0.7 |
| 194 | Mkl2    | MKL/myocardin-like 2                                                                           | 0.7 |
| 195 | Trim25  | tripartite motif-containing 25                                                                 | 0.7 |
| 196 | Man1c1  | mannosidase, alpha, class 1C, member 1                                                         | 0.7 |
| 197 | Fam101b | family with sequence similarity 101, member B                                                  | 0.7 |
| 198 | Gm10482 | predicted gene 10482                                                                           | 0.7 |
| 199 | Klf4    | Kruppel-like factor 4 (gut)                                                                    | 0.7 |
| 200 | Idh1    | isocitrate dehydrogenase 1 (NADP+), soluble                                                    | 0.7 |
| 201 | Reps2   | RALBP1 associated Eps domain containing protein 2                                              | 0.7 |
| 202 | Top3b   | topoisomerase (DNA) III beta                                                                   | 0.7 |
| 203 | Epas1   | endothelial PAS domain protein 1                                                               | 0.7 |
| 204 | Zfp787  | zinc finger protein 787                                                                        | 0.7 |
| 205 | Sema6a  | sema domain, transmembrane domain (TM), and cytoplasmic domain, (semaphorin) 6A                | 0.7 |
| 206 | Pdcd4   | programmed cell death 4                                                                        | 0.7 |
| 207 | Fam63b  | family with sequence similarity 63, member B                                                   | 0.7 |
| 208 | Cln6    | ceroid-lipofuscinosis, neuronal 6                                                              | 0.7 |
| 209 | Pias3   | protein inhibitor of activated STAT 3                                                          | 0.7 |
| 210 | Ets2    | E26 avian leukemia oncogene 2, 3' domain                                                       | 0.7 |
| 211 | Abca1   | ATP-binding cassette, sub-family A (ABC1), member 1                                            | 0.7 |
| 212 | Foxp1   | forkhead box P1                                                                                | 0.7 |
| 213 | Rab27a  | RAB27A, member of RAS oncogene family                                                          | 0.7 |
| 214 | Actr6   | ARP6 actin-related protein 6 homolog (yeast)                                                   | 0.7 |
| 215 | Npnt    | nephronectin                                                                                   | 0.6 |
| 216 | Kctd12b | potassium channel tetramerisation domain containing 12b                                        | 0.6 |
| 217 | Lmo2    | LIM domain only 2                                                                              | 0.6 |

*Continued*

Supplementary Table S1. *Continued.*

|     |          |                                                                                                                |     |
|-----|----------|----------------------------------------------------------------------------------------------------------------|-----|
| 218 | Hadh     | hydroxyacyl-Coenzyme A dehydrogenase                                                                           | 0.6 |
| 219 | Mkl2     | MKL/myocardin-like 2                                                                                           | 0.6 |
| 220 | Arhgef3  | Rho guanine nucleotide exchange factor 3                                                                       | 0.6 |
| 221 | Myct1    | myc target 1                                                                                                   | 0.6 |
| 222 | Cc2d2a   | coiled-coil and C2 domain containing 2A                                                                        | 0.6 |
| 223 | Sepp1    | selenoprotein P, plasma, 1                                                                                     | 0.6 |
| 224 | Zfp626   | zinc finger protein 626                                                                                        | 0.6 |
| 225 | Mal      | myelin and lymphocyte protein, T-cell differentiation protein                                                  | 0.6 |
| 226 | Meis2    | Meis homeobox 2                                                                                                | 0.6 |
| 227 | Dnm3     | dynamamin 3                                                                                                    | 0.6 |
| 228 | Snapi    | SNAP-associated protein                                                                                        | 0.6 |
| 229 | Tthl1    | tubulin tyrosine ligase-like 1                                                                                 | 0.6 |
| 230 | Cyp2j6   | cytochrome P450, family 2, subfamily j, polypeptide 6                                                          | 0.6 |
| 231 | Cd97     | CD97 antigen                                                                                                   | 0.6 |
| 232 | Cyrr1    | cysteine and tyrosine-rich protein 1                                                                           | 0.6 |
| 233 | Brcd2    | breast cancer 2                                                                                                | 0.6 |
| 234 | Tmtc2    | transmembrane and tetratricopeptide repeat containing 2                                                        | 0.6 |
| 235 | Ctnnd1   | catenin (cadherin associated protein), alpha-like 1                                                            | 0.6 |
| 236 | Abhd14b  | abhydrolase domain containing 14b                                                                              | 0.6 |
| 237 | Crybg3   | beta-gamma crystallin domain containing 3                                                                      | 0.6 |
| 238 | Scin     | scinderin                                                                                                      | 0.6 |
| 239 | Dusp6    | dual specificity phosphatase 6                                                                                 | 0.6 |
| 240 | Mansc1   | MANSC domain containing 1                                                                                      | 0.6 |
| 241 | Car5b    | carbonic anhydrase 5b, mitochondrial                                                                           | 0.6 |
| 242 | Sox17    | SRY-box containing gene 17                                                                                     | 0.6 |
| 243 | Gaintl4  | UDP-N-acetyl-alpha-D-galactosamine:polypeptide N-acetylgalactosaminyltransferase-like 4                        | 0.6 |
| 244 | Entpd1   | ectonucleoside triphosphate diphosphohydrolase 1                                                               | 0.6 |
| 245 | Pla2g16  | phospholipase A2, group XVI                                                                                    | 0.6 |
| 246 | Dax6     | DEAD (Asp-Glu-Ala-Asp) box polypeptide 6                                                                       | 0.6 |
| 247 | Rb1      | retinoblastoma 1                                                                                               | 0.6 |
| 248 | Dusp19   | dual specificity phosphatase 19                                                                                | 0.6 |
| 249 | Timp3    | tissue inhibitor of metalloproteinase 3                                                                        | 0.5 |
| 250 | Rnf125   | ring finger protein 125                                                                                        | 0.5 |
| 251 | Orc5     | origin recognition complex, subunit 5                                                                          | 0.5 |
| 252 | Scd2     | stearoyl-Coenzyme A desaturase 2                                                                               | 0.5 |
| 253 | Txnip    | thioredoxin interacting protein                                                                                | 0.5 |
| 254 | Mras     | muscle and microspikes RAS                                                                                     | 0.5 |
| 255 | Adamts5  | a disintegrin-like and metalloproteinase (reprolysin type) with thrombospondin type 1 motif, 5 (aggrecanase-2) | 0.5 |
| 256 | Tmem200a | transmembrane protein 200A                                                                                     | 0.5 |
| 257 | Gja5     | gap junction protein, alpha 5                                                                                  | 0.5 |
| 258 | Cdc42ep1 | CDC42 effector protein (Rho GTPase binding) 1                                                                  | 0.5 |
| 259 | Nynrin   | NYN domain and retroviral integrase containing                                                                 | 0.5 |
| 260 | Ebf1     | early B-cell factor 1                                                                                          | 0.5 |
| 261 | Stxbp4   | syntaxin binding protein 4                                                                                     | 0.4 |
| 262 | Suox     | sulfite oxidase                                                                                                | 0.4 |
| 263 | Arrdc3   | arrestin domain containing 3                                                                                   | 0.4 |
| 264 | Chic1    | cysteine-rich hydrophobic domain 1                                                                             | 0.3 |
